# Supplementary material
Source: PubMed Central journal article supplement (PMC3322240)
Supplement: mmc1.pdf [file mmc1.pdf]

## Supplemental Data

### Linkage-Disequilibrium-Based Binning

#### Affects the Interpretation of GWASs

Andrea Christoforou, Michael Dondrup, Morten Mattingsdal, Manuel Mattheisen, Sudheer Giddaluru, Markus M. Nöthen, Marcella Rietschel, Sven Cichon, Srdjan Djurovic, Ole A. Andreassen, Inge Jonassen, Vidar M. Steen, Pål Puntervoll, and Stéphanie Le Hellard

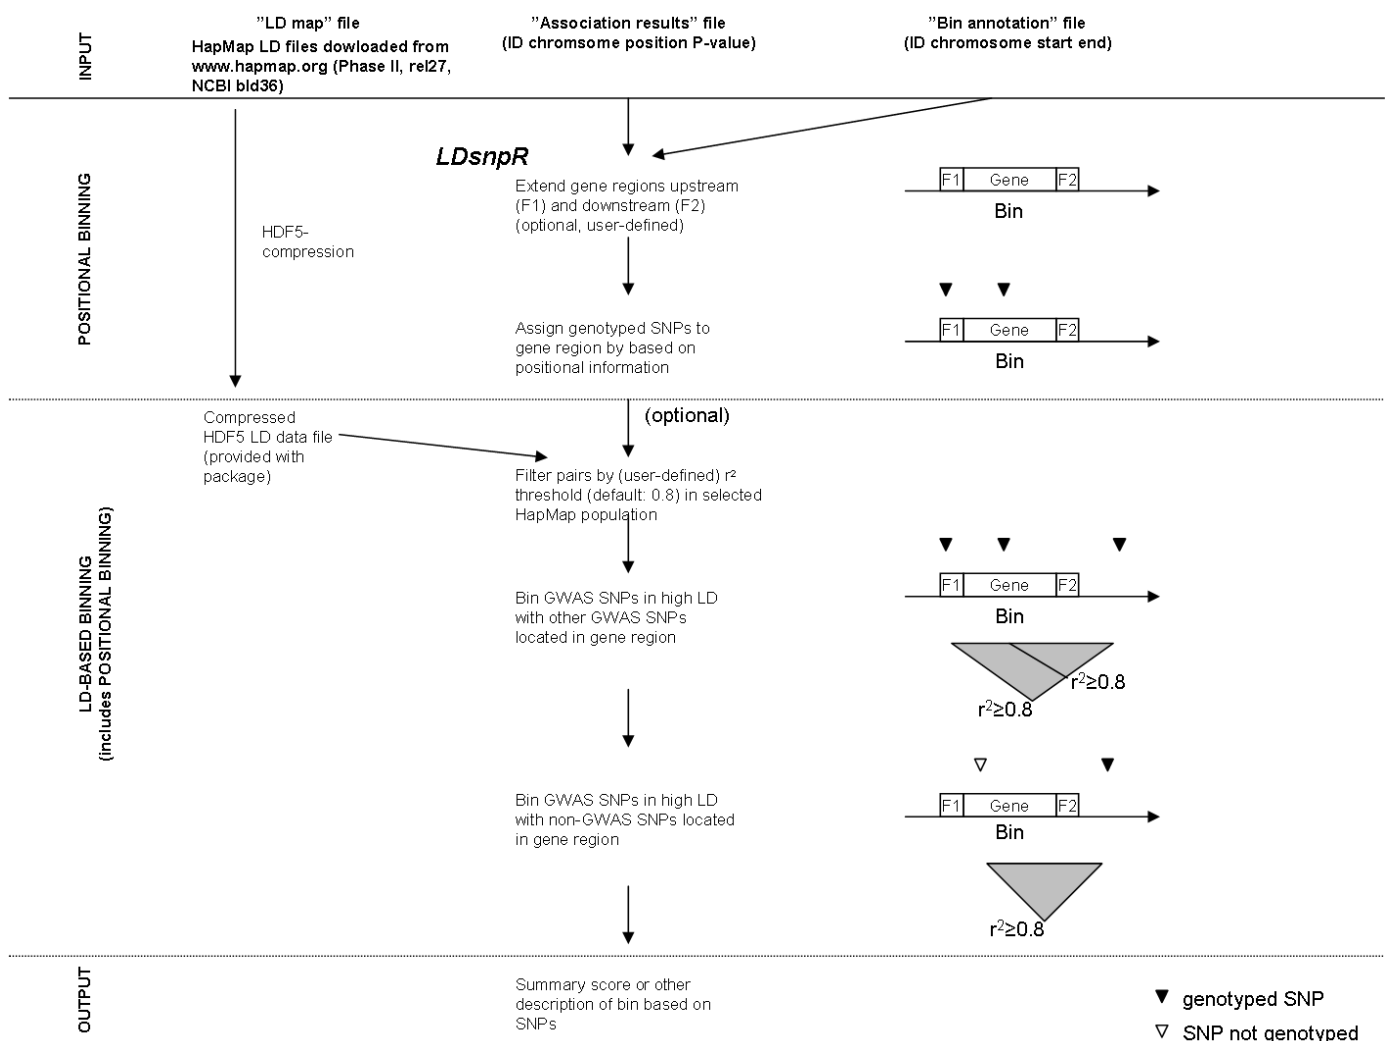

Figure S1. LDsnpr Workflow

The LDsnpR software, including details about its development and use, can be downloaded from <http://services.cbu.uib.no/software/ldsnpr>. Briefly, LDsnpR requires three input files. The first is a tab-delimited “Association Results” text file, containing the SNP identifiers, their chromosomal position and association result. The second is a tab-delimited “Bin Annotation” text file, containing the bin identifiers (e.g. EnsEMBL gene identifiers) and the start and stop coordinates of each bin. The third is a “LD map” file, containing the pre-calculated pairwise SNP LD information, which is specially compressed in HDF5 format (<http://www.hdfgroup.org/HDF5>) for computational efficiency. The binning process begins by extending the bin regions, which are defined in the “bin annotation” file, an amount specified by the user and then assigning SNPs to that region if they are physically located within that extended region – i.e. positional binning. Then, based on the user-defined LD threshold (default  $r^2 \geq 0.8$ ), LDsnpR searches the “LD map” file and identifies the relevant SNP pairs in which a genotyped SNP is paired with a SNP (genotyped or not) physically located within a bin. It then assigns the former, genotyped SNP to the bin in which the latter SNP is physically located – i.e. the LD-based binning approach. The LD-based binning approach includes positional binning. Finally, LDsnpR produces a text file of all of the bins and a user-declared summary of the bins, such as the number of SNPs per bin, the minimum *P*-value of all SNPs in the bin or a list of the SNPs in the bin, which can then be used for subsequent analyses. In the current version of LDsnpR, positional information for all SNPs must correspond to NCBI Build 36 of the human genome. Both “Bin Annotation” and “LD map” files used in this study are available for download with the package.

Table S1. Comparison of Positional and LD-Based-Binning Results for Top SNP Hits in Each GWAS

| Reported SNPs <sup>a</sup> | Ensembl Genes <sup>b</sup> - Positional Binning | Ensembl Genes <sup>b</sup> - LD-Based Binning |
|----------------------------|-------------------------------------------------|-----------------------------------------------|
| <b>WTCCC BP</b>            |                                                 |                                               |
| rs420259                   | PALB2                                           | PALB2                                         |
| rs4027132                  | -                                               | -                                             |
| rs7570682                  | -                                               | -                                             |
| rs1375144                  | DPP10                                           | DPP10                                         |
| <b>rs2953145</b>           | <b>RNPEPL1</b>                                  | <b>RNPEPL1; CAPN10</b>                        |
| rs4276227                  | CMTM8                                           | CMTM8                                         |
| rs683395                   | LAMP3                                           | LAMP3                                         |
| rs6458307                  | KIAA0240; ENSG00000181524                       | KIAA0240; ENSG00000181524                     |
| rs2609653                  | -                                               | -                                             |
| rs10982256                 | DFNB31                                          | DFNB31                                        |
| rs10134944                 | -                                               | -                                             |
| <b>rs11622475</b>          | <b>TDRD9</b>                                    | <b>C14orf2; TDRD9; ENSG00000211292</b>        |
| rs1344484                  | -                                               | -                                             |
| <b>rs3761218</b>           | <b>CDC25B; CENPB</b>                            | <b>C20orf27; SPEF1; CDC25B; CENPB</b>         |
| <b>TOP BP</b>              |                                                 |                                               |
| rs6679053                  | PLD5                                            | PLD5                                          |
| rs12052834                 | -                                               | -                                             |
| rs4257412                  | -                                               | -                                             |
| rs1529289                  | CNTNAP5                                         | CNTNAP5                                       |
| rs2420559                  | CNTNAP5                                         | CNTNAP5                                       |
| rs2699365                  | CNTNAP5                                         | CNTNAP5                                       |
| rs13216050                 | -                                               | -                                             |
| rs10901040                 | DPP6                                            | DPP6                                          |
| rs4960568                  | DPP6                                            | DPP6                                          |
| rs1510122                  | -                                               | -                                             |
| rs1567426                  | -                                               | -                                             |
| rs448245                   | -                                               | -                                             |
| rs264826                   | -                                               | -                                             |
| rs7844514                  | ENSG00000104324                                 | ENSG00000104324                               |
| rs2578121                  | -                                               | -                                             |
| rs1435961                  | -                                               | -                                             |
| rs7100273                  | -                                               | -                                             |
| rs7081438                  | -                                               | -                                             |
| rs7119726                  | SHANK2                                          | SHANK2                                        |
| rs7310876                  | -                                               | -                                             |
| rs1750565                  | ENSG00000220558                                 | ENSG00000220558                               |
| rs1798968                  | ENSG00000220558                                 | ENSG00000220558                               |
| rs809846                   | ENSG00000220558                                 | ENSG00000220558                               |
| rs1750567                  | ENSG00000220558                                 | ENSG00000220558                               |
| rs11617400                 | GUCY1B2                                         | GUCY1B2                                       |
| rs9527256                  | -                                               | -                                             |
| rs8042197                  | -                                               | -                                             |

|                          |                            |                                                                                      |
|--------------------------|----------------------------|--------------------------------------------------------------------------------------|
| rs1848053                | -                          | -                                                                                    |
| rs931781                 | -                          | -                                                                                    |
| rs7183870                | SLCO3A1                    | SLCO3A1                                                                              |
| rs7184694                | -                          | -                                                                                    |
| rs11652429               | -                          | -                                                                                    |
| rs11080256               | -                          | -                                                                                    |
| rs11658512               | -                          | -                                                                                    |
| rs1292735                | -                          | -                                                                                    |
|                          |                            |                                                                                      |
| <b>German BP</b>         |                            |                                                                                      |
| <b><i>rs1064395</i></b>  | <b><i>NCAN; HAPLN4</i></b> | <b><i>NCAN; HAPLN4; TM6SF2; SF4; KIAA0892; GATAD2A; MIRN640; ENSG00000213993</i></b> |
| rs11764590               | MAD1L1                     | MAD1L1                                                                               |
| <b><i>rs10278591</i></b> | <b><i>MAD1L1</i></b>       | <b><i>MAD1L1; ENSG00000176349; ENSG00000215135</i></b>                               |
| rs6547829                | BRE                        | BRE                                                                                  |
| rs985409                 | LHFPL3                     | LHFPL3                                                                               |
| rs2209263                | -                          | -                                                                                    |
| rs779279                 | -                          | -                                                                                    |
| <b><i>rs9322993</i></b>  | <b><i>SIP1</i></b>         | <b><i>SEC23A; SIP1; TRAPPC6B; PNN; CTAGE4</i></b>                                    |

SNPs extracted from WTCCC: Table 4 in ref. 18; TOP: Table 1 in ref. 19; and German: Table 2 in ref. 20. b. Ensembl 54 (May 2009), gene symbol, if known; otherwise Ensembl gene ID. Bold italicised rows indicate SNPs with different annotation after LD-based binning was performed.

Table S2. Effects of LD-Based Binning Compared to Resampling on the Ranks of SNPs and Genes in the WTCCC BP GWAS

|                                       | <b>SNP</b>   | <b>Gene Level (Positional</b> | <b>Gene Level (LD-Based</b> | <b>Gene Level (Positional / LD-Based</b> |
|---------------------------------------|--------------|-------------------------------|-----------------------------|------------------------------------------|
| <b>Spearman Rank Correlation</b>      | <b>Level</b> | <b>Binning)</b>               | <b>Binning)</b>             | <b>Binning)</b>                          |
| <b>MEAN</b>                           | 0.85         | 0.87                          | 0.88                        | 0.80                                     |
| <b>SD</b>                             | 0.0031       | 0.0034                        | 0.0036                      | 0.0018                                   |
| <b>Percent difference in top 2000</b> |              | <b>Gene level (Positional</b> | <b>Gene level (LD based</b> | <b>Gene level (Positional / LD based</b> |
| <b>genes</b>                          |              | <b>binning)</b>               | <b>binning)</b>             | <b>binning)</b>                          |
| <b>MEAN</b>                           | NA           | 25.6                          | 25.6                        | 30.7                                     |
| <b>SD</b>                             | NA           | 0.76                          | 0.98                        | 0.62                                     |

Mean and SD (standard deviation) of pairwise measures (rank correlation or % difference) resulting from a re-sampling analysis in which 5% of the samples in the WTCCC dataset (genotype data from the European Genome-phenome Archive: [www.ebi.ac.uk/ega](http://www.ebi.ac.uk/ega)) were randomly excluded (20 repetitions). SNP-level P-values (autosomes only) are based on the TREND test, as implemented in PLINK.
